# Supplementary material
Source: publisher site journal article supplement (https://www.kjim.org/upload/media/kjim-2025-171-Supplementary-Table-11.pdf)
Supplement: Supplementary file 1 [file kjim-2025-171-Supplementary-Table-11.pdf]

**Supplementary Table 11. Stratification analysis of the incident risk of cholelithiasis following zoster vaccination in the propensity score-matched cohort**

| Cholelithiasis                       | Events, n (%) | Incidence rate <sup>b)</sup> | aHR (95% CI)                      |                                   |
|--------------------------------------|---------------|------------------------------|-----------------------------------|-----------------------------------|
|                                      |               |                              | Model 1 <sup>c)</sup>             | Model 2 <sup>d)</sup>             |
| Sex                                  |               |                              |                                   |                                   |
| Male                                 |               |                              |                                   |                                   |
| Unvaccinated                         | 9,739 (3.07)  | 2.41                         | 1.0 (reference)                   | 1.0 (reference)                   |
| Vaccinated                           | 7,144 (2.22)  | 1.96                         | 0.78 (0.76 to 0.81) <sup>e)</sup> | 0.77 (0.75 to 0.80) <sup>e)</sup> |
| Female                               |               |                              |                                   |                                   |
| Unvaccinated                         | 10,241 (2.48) | 2.53                         | 1.0 (reference)                   | 1.0 (reference)                   |
| Vaccinated                           | 8,499 (2.08)  | 2.33                         | 0.87 (0.84 to 0.89) <sup>e)</sup> | 0.86 (0.83 to 0.88) <sup>e)</sup> |
| Age (yr)                             |               |                              |                                   |                                   |
| < 60                                 |               |                              |                                   |                                   |
| Unvaccinated                         | 7,217 (3.71)  | 1.79                         | 1.0 (reference)                   | 1.0 (reference)                   |
| Vaccinated                           | 5,228 (2.66)  | 1.43                         | 0.74 (0.72 to 0.77) <sup>e)</sup> | 0.73 (0.71 to 0.76) <sup>e)</sup> |
| ≥ 60                                 |               |                              |                                   |                                   |
| Unvaccinated                         | 12,763 (2.38) | 3.16                         | 1.0 (reference)                   | 1.0 (reference)                   |
| Vaccinated                           | 10,415 (1.95) | 2.85                         | 0.87 (0.85 to 0.90) <sup>e)</sup> | 0.87 (0.85 to 0.89) <sup>e)</sup> |
| Region of residence                  |               |                              |                                   |                                   |
| Urban                                |               |                              |                                   |                                   |
| Unvaccinated                         | 9,344 (2.75)  | 2.31                         | 1.0 (reference)                   | 1.0 (reference)                   |
| Vaccinated                           | 7,520 (2.22)  | 2.06                         | 0.84 (0.82 to 0.87) <sup>e)</sup> | 0.83 (0.81 to 0.86) <sup>e)</sup> |
| Rural                                |               |                              |                                   |                                   |
| Unvaccinated                         | 10,636 (2.72) | 2.63                         | 1.0 (reference)                   | 1.0 (reference)                   |
| Vaccinated                           | 8,123 (2.07)  | 2.22                         | 0.81 (0.79 to 0.84) <sup>e)</sup> | 0.80 (0.78 to 0.83) <sup>e)</sup> |
| Household income                     |               |                              |                                   |                                   |
| Low (0th–39th percentile)            |               |                              |                                   |                                   |
| Unvaccinated                         | 5,776 (2.73)  | 1.43                         | 1.0 (reference)                   | 1.0 (reference)                   |
| Vaccinated                           | 4,375 (2.08)  | 1.20                         | 0.81 (0.78 to 0.84) <sup>e)</sup> | 0.80 (0.77 to 0.83) <sup>e)</sup> |
| Middle (40th–79th percentile)        |               |                              |                                   |                                   |
| Unvaccinated                         | 7,280 (2.75)  | 1.80                         | 1.0 (reference)                   | 1.0 (reference)                   |
| Vaccinated                           | 5,616 (2.15)  | 1.54                         | 0.83 (0.80 to 0.86) <sup>e)</sup> | 0.82 (0.79 to 0.85) <sup>e)</sup> |
| High (80th–100th percentile)         |               |                              |                                   |                                   |
| Unvaccinated                         | 6,924 (2.71)  | 1.71                         | 1.0 (reference)                   | 1.0 (reference)                   |
| Vaccinated                           | 5,652 (2.18)  | 1.55                         | 0.84 (0.81 to 0.87) <sup>e)</sup> | 0.83 (0.80 to 0.86) <sup>e)</sup> |
| Body mass index (kg/m <sup>2</sup> ) |               |                              |                                   |                                   |
| < 23.0                               |               |                              |                                   |                                   |
| Unvaccinated                         | 4,376 (2.29)  | 1.08                         | 1.0 (reference)                   | 1.0 (reference)                   |
| Vaccinated                           | 3,562 (1.86)  | 0.98                         | 0.86 (0.82 to 0.90) <sup>e)</sup> | 0.85 (0.81 to 0.89) <sup>e)</sup> |
| 23.0–24.9                            |               |                              |                                   |                                   |
| Unvaccinated                         | 5,221 (2.61)  | 1.29                         | 1.0 (reference)                   | 1.0 (reference)                   |
| Vaccinated                           | 4,086 (2.05)  | 1.12                         | 0.83 (0.80 to 0.87) <sup>e)</sup> | 0.83 (0.79 to 0.86) <sup>e)</sup> |
| ≥ 25.0                               |               |                              |                                   |                                   |
| Unvaccinated                         | 10,383 (3.06) | 2.57                         | 1.0 (reference)                   | 1.0 (reference)                   |
| Vaccinated                           | 7,995 (2.35)  | 2.19                         | 0.81 (0.79 to 0.83) <sup>e)</sup> | 0.80 (0.78 to 0.83) <sup>e)</sup> |

Supplementary Table 11. Continued

| Cholelithiasis                             | Events, n (%) | Incidence rate <sup>b)</sup> | aHR (95% CI)                      |                                   |
|--------------------------------------------|---------------|------------------------------|-----------------------------------|-----------------------------------|
|                                            |               |                              | Model 1 <sup>c)</sup>             | Model 2 <sup>d)</sup>             |
| Smoking status <sup>a)</sup>               |               |                              |                                   |                                   |
| Non-smoker                                 |               |                              |                                   |                                   |
| Unvaccinated                               | 12,996 (2.57) | 3.22                         | 1.0 (reference)                   | 1.0 (reference)                   |
| Vaccinated                                 | 10,413 (2.08) | 2.85                         | 0.85 (0.82 to 0.87) <sup>e)</sup> | 0.84 (0.82 to 0.86) <sup>e)</sup> |
| Smoker                                     |               |                              |                                   |                                   |
| Unvaccinated                               | 6,984 (3.09)  | 1.73                         | 1.0 (reference)                   | 1.0 (reference)                   |
| Vaccinated                                 | 5,230 (2.27)  | 1.43                         | 0.79 (0.76 to 0.82) <sup>e)</sup> | 0.78 (0.75 to 0.81) <sup>e)</sup> |
| Alcohol consumption (day per week)         |               |                              |                                   |                                   |
| < 1                                        |               |                              |                                   |                                   |
| Unvaccinated                               | 8,925 (2.20)  | 2.21                         | 1.0 (reference)                   | 1.0 (reference)                   |
| Vaccinated                                 | 6,516 (1.61)  | 1.78                         | 0.78 (0.75 to 0.80) <sup>e)</sup> | 0.77 (0.75 to 0.80) <sup>e)</sup> |
| 1–4                                        |               |                              |                                   |                                   |
| Unvaccinated                               | 10,693 (3.41) | 2.65                         | 1.0 (reference)                   | 1.0 (reference)                   |
| Vaccinated                                 | 8,823 (2.81)  | 2.42                         | 0.86 (0.83 to 0.88) <sup>e)</sup> | 0.85 (0.83 to 0.87) <sup>e)</sup> |
| ≥ 5                                        |               |                              |                                   |                                   |
| Unvaccinated                               | 362 (3.00)    | 0.09                         | 1.0 (reference)                   | 1.0 (reference)                   |
| Vaccinated                                 | 304 (2.30)    | 0.08                         | 0.83 (0.72 to 0.97) <sup>e)</sup> | 0.82 (0.70 to 0.96) <sup>e)</sup> |
| Physical activity                          |               |                              |                                   |                                   |
| Insufficient physical activity             |               |                              |                                   |                                   |
| Unvaccinated                               | 15,449 (2.75) | 3.82                         | 1.0 (reference)                   | 1.0 (reference)                   |
| Vaccinated                                 | 12,062 (2.17) | 3.30                         | 0.83 (0.81 to 0.85) <sup>e)</sup> | 0.82 (0.80 to 0.84) <sup>e)</sup> |
| Sufficient physical activity               |               |                              |                                   |                                   |
| Unvaccinated                               | 4,531 (2.66)  | 1.12                         | 1.0 (reference)                   | 1.0 (reference)                   |
| Vaccinated                                 | 3,581 (2.04)  | 0.98                         | 0.81 (0.78 to 0.85) <sup>e)</sup> | 0.80 (0.77 to 0.84) <sup>e)</sup> |
| Medication use for coronary artery disease |               |                              |                                   |                                   |
| No                                         |               |                              |                                   |                                   |
| Unvaccinated                               | 19,126 (2.71) | 4.73                         | 1.0 (reference)                   | 1.0 (reference)                   |
| Vaccinated                                 | 14,939 (2.12) | 4.09                         | 0.82 (0.81 to 0.84) <sup>e)</sup> | 0.82 (0.80 to 0.83) <sup>e)</sup> |
| Yes                                        |               |                              |                                   |                                   |
| Unvaccinated                               | 854 (3.26)    | 0.21                         | 1.0 (reference)                   | 1.0 (reference)                   |
| Vaccinated                                 | 704 (2.72)    | 0.19                         | 0.87 (0.79 to 0.97) <sup>e)</sup> | 0.87 (0.79 to 0.96) <sup>e)</sup> |
| Medication use for hypertension            |               |                              |                                   |                                   |
| No                                         |               |                              |                                   |                                   |
| Unvaccinated                               | 12,790 (2.63) | 3.17                         | 1.0 (reference)                   | 1.0 (reference)                   |
| Vaccinated                                 | 9,741 (2.04)  | 2.67                         | 0.83 (0.80 to 0.85) <sup>e)</sup> | 0.82 (0.80 to 0.84) <sup>e)</sup> |
| Yes                                        |               |                              |                                   |                                   |
| Unvaccinated                               | 7,190 (2.94)  | 1.78                         | 1.0 (reference)                   | 1.0 (reference)                   |
| Vaccinated                                 | 5,902 (2.33)  | 1.62                         | 0.82 (0.79 to 0.85) <sup>e)</sup> | 0.82 (0.79 to 0.85) <sup>e)</sup> |

Supplementary Table 11. Continued

| Cholelithiasis                    | Events, n (%) | Incidence rate <sup>b)</sup> | aHR (95% CI)                      |                                   |
|-----------------------------------|---------------|------------------------------|-----------------------------------|-----------------------------------|
|                                   |               |                              | Model 1 <sup>c)</sup>             | Model 2 <sup>d)</sup>             |
| Medication use for diabetes       |               |                              |                                   |                                   |
| No                                |               |                              |                                   |                                   |
| Unvaccinated                      | 16,814 (2.65) | 4.16                         | 1.0 (reference)                   | 1.0 (reference)                   |
| Vaccinated                        | 12,979 (2.07) | 3.55                         | 0.83 (0.81 to 0.85) <sup>e)</sup> | 0.82 (0.80 to 0.84) <sup>e)</sup> |
| Yes                               |               |                              |                                   |                                   |
| Unvaccinated                      | 3,166 (3.28)  | 0.78                         | 1.0 (reference)                   | 1.0 (reference)                   |
| Vaccinated                        | 2,664 (2.59)  | 0.73                         | 0.81 (0.77 to 0.86) <sup>e)</sup> | 0.81 (0.77 to 0.85) <sup>e)</sup> |
| Medication use for hyperlipidemia |               |                              |                                   |                                   |
| No                                |               |                              |                                   |                                   |
| Unvaccinated                      | 17,061 (2.73) | 4.22                         | 1.0 (reference)                   | 1.0 (reference)                   |
| Vaccinated                        | 13,158 (2.12) | 3.60                         | 0.83 (0.81 to 0.85) <sup>e)</sup> | 0.82 (0.80 to 0.84) <sup>e)</sup> |
| Yes                               |               |                              |                                   |                                   |
| Unvaccinated                      | 2,919 (2.77)  | 0.72                         | 1.0 (reference)                   | 1.0 (reference)                   |
| Vaccinated                        | 2,485 (2.22)  | 0.68                         | 0.82 (0.78 to 0.87) <sup>e)</sup> | 0.82 (0.77 to 0.86) <sup>e)</sup> |

aHR, adjusted hazard ratio; CI, confidence interval.

<sup>a)</sup>Non-smoker indicates individuals who do not currently smoke.

<sup>b)</sup>Incidence rate expressed as per 1,000 person-years.

<sup>c)</sup>Models 1: adjusted for age (50–54, 55–59, 60–64, and ≥ 65 years) and sex.

<sup>d)</sup>Model 2: adjusted for age (50–54, 55–59, 60–64, and ≥ 65 years); sex; household income (low income, middle income, and high income); region of residence (urban and rural); Charlson comorbidity index (0, 1, and ≥ 2); obesity (underweight [ $< 18.5 \text{ kg/m}^2$ ], normal [ $18.5\text{--}22.9 \text{ kg/m}^2$ ], overweight [ $23.0\text{--}24.9 \text{ kg/m}^2$ ], and obese [ $\geq 25.0 \text{ kg/m}^2$ ]); blood pressure (systolic blood pressure  $< 140 \text{ mmHg}$  and diastolic blood pressure  $< 90 \text{ mmHg}$  and systolic blood pressure  $\geq 140 \text{ mmHg}$  or diastolic blood pressure  $\geq 90 \text{ mmHg}$ ); fasting blood glucose ( $< 100$  and  $\geq 100 \text{ mg/dL}$ ); glomerular filtration rate ( $< 60$ ,  $60\text{--}89$ , and  $\geq 90 \text{ mL/min/1.73 m}^2$ ); smoking status (non-, ex-, and current smoker); alcohol consumption (drinks;  $< 1$ ,  $1\text{--}2$ ,  $3\text{--}4$ , and  $\geq 5$  days per week); aerobic physical activity (sufficient and insufficient); and history of medication use for coronary artery disease, diabetes mellitus, dyslipidemia, and hypertension.

<sup>e)</sup>Significant differences ( $p < 0.05$ ).
